# Supplementary material
Source: Royal Society of Chemistry journal article supplement (doi:10.1039/d6cp00751a)
Supplement: d6cp00751a1.pdf [file d6cp00751a1.pdf]

## Supporting Information

### **Recent Advances of the manganese-copper bimetallic oxide catalysts for catalytic oxidation of VOC: types, preparation methods and catalytic performances**

Chunnu Geng<sup>a</sup>, Shuang Chen<sup>a\*</sup>, Mengying Li<sup>a</sup>, Xuecai Wang<sup>d</sup>, Jian-Rong Li<sup>b,c\*</sup>

*<sup>a</sup>Faculty of Urban Construction and Ecological Technology, Shanghai Institute of Technology, Shanghai 201418, P.R. China.*

*<sup>b</sup>State Key Laboratory of Advanced Environmental Technology, Institute of Urban Environment, Chinese Academy of Sciences, Xiamen 361021, P.R. China.*

*<sup>c</sup>School of Environmental Science and Engineering, Zhejiang Gongshang University, Hangzhou 310018, China.*

*<sup>d</sup>Shanghai Agricultural Technology Extension & Service Center, Shanghai 201103, P.R. China.*

\*Corresponding author:

E-mail: jr360@163.com, jrli@iue.ac.cn, (Jian-Rong Li)

E-mail: cs18110@163.com (Shuang Chen)

Table S1 The detailed catalyst types, reaction condition and key VOC catalytic oxidation performance parameters of the different catalysts

| VOCs      | Con.<br>/ppm | Catalyst types                                                                       | Catalysts                                           | WHSV<br>/GHSV         | T <sub>90</sub><br>/°C | Ref. |
|-----------|--------------|--------------------------------------------------------------------------------------|-----------------------------------------------------|-----------------------|------------------------|------|
| Toluene   | 500          | CuO <sub>x</sub> /MnO <sub>x</sub>                                                   | CuO/MnO <sub>2</sub> -R-10                          | 60000 h <sup>-1</sup> | 234                    | 1    |
| Toluene   | 1000         | MnO <sub>x</sub> /Cu <sub>x</sub> Mn <sub>3-x</sub> O <sub>4</sub>                   | Mn <sub>5</sub> Cu <sub>1</sub>                     | 30000 mL/(g·h)        | 212                    | 2    |
| Toluene   | 1000         | Cu <sub>x</sub> Mn <sub>3-x</sub> O <sub>4</sub>                                     | MnCu <sub>0.5</sub>                                 | 40000 mL/(g·h)        | 210                    | 3    |
| Toluene   | 1000         | Cu doped MnO <sub>x</sub>                                                            | MnO <sub>2</sub> -CM                                | 40000 mL/(g·h)        | 209                    | 4    |
| Toluene   | 500          | Cu doped MnO <sub>x</sub>                                                            | CuMnO <sub>x</sub> -HS                              | 60000 mL/(g·h)        | 212                    | 5    |
| Toluene   | 500          | CuO <sub>x</sub> /MnO <sub>x</sub> /Cu <sub>x</sub> Mn <sub>3-x</sub> O <sub>4</sub> | CM-4                                                | 22500 h <sup>-1</sup> | 213                    | 6    |
| Toluene   | 1000         | MnO <sub>x</sub> /Cu <sub>x</sub> Mn <sub>3-x</sub> O <sub>4</sub>                   | Cu1Mn1O-500                                         | 60000(GHSV)           | 214                    | 7    |
| Toluene   | 1000         | Cu <sub>x</sub> Mn <sub>3-x</sub> O <sub>4</sub>                                     | MnCu                                                | 40000 mL/(g·h)        | 214                    | 8    |
| Toluene   | 1000         | MnO <sub>x</sub> /Cu <sub>x</sub> Mn <sub>3-x</sub> O <sub>4</sub>                   | CMO-ALK60                                           | 60000 h <sup>-1</sup> | 245                    | 9    |
| Toluene   | 1000         | Cu <sub>x</sub> Mn <sub>3-x</sub> O <sub>4</sub>                                     | 2NaOH/CuMn <sub>2</sub> O <sub>4</sub>              | 20000 h <sup>-1</sup> | 188                    | 10   |
| Toluene   | 500          | CuO <sub>x</sub> /Cu <sub>x</sub> Mn <sub>3-x</sub> O <sub>4</sub>                   | Cu <sub>2</sub> Mn <sub>1</sub> O <sub>x</sub> -500 | 10000 h <sup>-1</sup> | 220                    | 11   |
| Toluene   | 1000         | Cu <sub>x</sub> Mn <sub>3-x</sub> O <sub>4</sub>                                     | CuMn <sub>2</sub> O <sub>4</sub> -EG-350            | 20000 h <sup>-1</sup> | 208                    | 12   |
| Toluene   | 500          | Cu doped MnO <sub>x</sub>                                                            | MnO <sub>2</sub> -OV3                               | 22500 mL/(g·h)        | 216                    | 13   |
| Toluene   | 1000         | Cu <sub>x</sub> Mn <sub>3-x</sub> O <sub>4</sub>                                     | CM2-400                                             | 5000 h <sup>-1</sup>  | 188                    | 14   |
| Toluene   | 500          | Cu doped MnO <sub>x</sub>                                                            | CuMnO <sub>2</sub> -500-Q                           | 6000 mL/(g·h)         | 235                    | 15   |
| Toluene   | 500          | CuO <sub>x</sub> /MnO <sub>x</sub>                                                   | CuO/MnO <sub>2</sub>                                | 60000 h <sup>-1</sup> | 238                    | 16   |
| Toluene   | 1000         | Cu <sub>x</sub> Mn <sub>3-x</sub> O <sub>4</sub>                                     | CuMn-500-1                                          | 36000 mL/(g·h)        | 220                    | 17   |
| Toluene   | 500          | MnO <sub>x</sub> /Cu <sub>x</sub> Mn <sub>3-x</sub> O <sub>4</sub>                   | CMO-2                                               | 60000 h <sup>-1</sup> | 220                    | 18   |
| Toluene   | 1000         | MnO <sub>x</sub> /Cu <sub>x</sub> Mn <sub>3-x</sub> O <sub>4</sub>                   | MnO <sub>2</sub> /CMO                               | 60000 mL/(g·h)        | 220                    | 19   |
| Toluene   | 1000         | Cu doped MnO <sub>x</sub>                                                            | Cu-MnO <sub>2</sub>                                 | 40000 mL/(g·h)        | 228                    | 20   |
| Toluene   | 500          | MnO <sub>x</sub> /Cu <sub>x</sub> Mn <sub>3-x</sub> O <sub>4</sub>                   | Mn <sub>85</sub> Cu <sub>15</sub>                   | 20000 h <sup>-1</sup> | 220                    | 21   |
| Propylene | 500          | MnO <sub>x</sub> /Cu <sub>x</sub> Mn <sub>3-x</sub> O <sub>4</sub>                   | Mn <sub>85</sub> Cu <sub>15</sub>                   | 20000 h <sup>-1</sup> | 190                    | 21   |
| Ethylene  | 500          | Cu <sub>x</sub> Mn <sub>3-x</sub> O <sub>4</sub>                                     | Mn <sub>55</sub> Cu <sub>45</sub>                   | 20000 h <sup>-1</sup> | 220                    | 21   |
| Benzene   | 500          | Cu doped MnO <sub>x</sub>                                                            | Cu <sub>0.1</sub> -α-MnO <sub>2</sub>               | 60000 mL/(g·h)        | 223                    | 22   |
| Benzene   | 900          | Cu doped MnO <sub>x</sub>                                                            | Cu-MnO <sub>2</sub>                                 | 60000 mL/(g·h)        | 220                    | 23   |
| Acetone   | 1000         | CuO <sub>x</sub> /MnO <sub>x</sub>                                                   | CuMn <sub>1.0</sub>                                 | 90000 mL/(g·h)        | 155                    | 24   |
| Acetone   | 1019         | CuO <sub>x</sub> /MnO <sub>x</sub> /Cu <sub>x</sub> Mn <sub>3-x</sub> O <sub>4</sub> | CuMn <sub>2</sub> O <sub>x</sub>                    | 18000 mL/(g·h)        | 150                    | 25   |
| Acetone   | 1000         | CuO <sub>x</sub> /Cu <sub>x</sub> Mn <sub>3-x</sub> O <sub>4</sub>                   | 0.3-KOH/CMO                                         | 30000 mL/(g·h)        | 170                    | 26   |
| m-Xylene  | 300          | Cu <sub>x</sub> Mn <sub>3-x</sub> O <sub>4</sub>                                     | CuMn <sub>2</sub> O <sub>4</sub>                    | 60000 mL/(g·h)        | 246                    | 27   |

## References :

1. W. Liu, W. Xiang, X. Chen, Z. Song, C. Gao, N. Tsubaki and X. Zhang, *Fuel*, 2022, **312**.122975.
2. Y. Jiang, S. Cheng, C. Su, Y. Jiang, X. Sun, G. Zhang, Y. Liu, X. Dou and Z. Yang, *Appl. Surf. Sci.*, 2024, **670**.160629.
3. J. R. Li, W. P. Zhang, C. Li and C. He, *J. Colloid Interface Sci.*, 2021, **591**, 396-408.
4. Y. Sun, X. Wang, Y. Dong, X. Niu and Y. Zhu, *J. Environ. Chem. Eng.*, 2023, **11**.110670.
5. W. Liu, S. Wang, R. Cui, Z. Song and X. Zhang, *Microporous Mesoporous Mater.*, 2021, **326**.111370.

6. Y. Xu, Z. Qu, Y. Ren and C. Dong, *Appl. Surf. Sci.*, 2021, **560**.149983.
7. J. Hu, W. B. Li and R. F. Liu, *Catal. Today*, 2018, **314**, 147-153.
8. J.-R. Li, W.-P. Zhang, C. Li, H. Xiao and C. He, *Appl. Surf. Sci.*, 2021, **550**.149179.
9. Y. Yang, W. Si, Y. Peng, J. Chen, Y. Wang, D. Chen, Z. Tian, J. Wang and J. Li, *Appl. Catal. B: Environ.*, 2024, **340**.123142.
10. Y. Zhang, Y. Li, Z. Zeng, J. Hu and Z. Huang, *Fuel*, 2022, **314**.122747.
11. D. Xia and Z. Zhang, *Environ. Prog. Sustain. Energy*, 2023, **42**.14226.
12. Y. Zhang, Y. Li, Z. Zeng, J. Hu, Y. Hou and Z. Huang, *Mol. Catal.*, 2022, **517**.112043.
13. C. Dong, Z. Qu, X. Jiang and Y. Ren, *J. Hazard Mater.*, 2020, **391**, 122181.
14. Y. Zheng, J. Deng, C. Liu, C. Wang and S. Peng, *J. Alloys Compd.*, 2025, **1031**.181033.
15. X. Wang, S. Yang, Z. Song, X. Chen, W. Liu and X. Zhang, *J. Hazard Mater.*, 2025, **488**, 137297.
16. W. Xiang, W. Liu, G. Liu, Y. He, S. Yang, X. Chen, Z. Song, X. Zhang and N. Tsubaki, *Mater. Today Chem.*, 2025, **44**.102604.
17. J. Deng, C. Wang, S. Ma, C. Liu, Y. Zheng, H. Chen, R. Chen, S. Wei, S. Peng and X. Jiang, *J. Environ. Chem. Eng.*, 2025, **13**.116733.
18. Y. Liang, B. Wang, Y. Xuan, W. Fan, P. An, S. Meng, X. Zhu, Y. Yun, T. Luan, D. Wang, Y. Peng and J. Crittenden, *Appl. Catal. B: Environ Energy*, 2025, **373**.125325.
19. Q. Zhang, Y. Wu, H. Jian, A. Wang, H. Yang and C. Han, *J. Mater. Chem. A*, 2025, **13**, 40005-40016.
20. J. Lei, L. Pei, Y. Huang, X. Ren, L. Cheng, S. Wang and J. Wang, *J. Solid State Chem.*, 2025, **350**.125503.
21. C. Cocuzza, E. Sartoretti, C. Novara, F. Giorgis, S. Bensaid, N. Russo, D. Fino and M. Piumetti, *Catal. Today*, 2023, **423**.114292.
22. S. Gan, Z. Huang, X. Liao, J. Chen, J. Ni, Q. Zhou, W. Chen, M. Tian, J. Chen, J. Gong and G. Jing, *Fuel*, 2025, **381**.133327.
23. Y. Liu, W. Zong, H. Zhou, D. Wang, R. Cao, J. Zhan, L. Liu and B. W. L. Jang, *Catal. Sci Technol.*, 2018, **8**, 5344-5358.
24. P. Li, J. Wang, B. Sun, N. Zhang and L. Cheng, *Inorg. Chem. Commun.*, 2023, **149**.110431.
25. L. Wang, Y. Sun, Y. Zhu, J. Zhang, J. Ding, J. Gao, W. Ji, Y. Li, L. Wang and Y. Ma, *J. Colloid Interface Sci.*, 2022, **622**, 577-590.
26. M. Xu, L. Wang, Y. Sun, Y. Ma, X. Zhang, J. Zhang, Y. Zhu, L. Zhu, S. Qiao, J. Wei, W. Ji and F. Lin, *Sep. Purif. Technol.*, 2024, **345**.127339.

27. X. Zhong, X. He, J. Tian, C. Yu, W. Kong, C. Qiu, S. Weng, Y. Li, Y. Chen, C. Yang, M. Fu and D. Ye, *Environ. Sci. Technol.*, 2025, **59**, 15468-15480.
